# Supplementary material
Source: Springer Nature journal article supplement (https://www.springermedizin.de/resource/supplementary/12984_2010_318_MOESM2_ESM.pdf/9605762)

Menu Options

Patient Name

Exercise #

0:21

Score

0

Default

1

Time ElapsedExercise ScoreKey PointsTrajectory PathGoal PointCurrent Location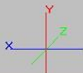

Supplement: MOESM2 [file 9605762]
